# Supplementary material
Source: publisher figshare collection journal article supplement (https://acs.figshare.com/ndownloader/files/4144921)
Supplement: Supplementary file 1 [file 4144921]

# Halogen-free Flame-retardant Flexible Polyurethane Foam with a Novel Nitrogen-Phosphorus Flame Retardant

*Ming-Jun Chen, Zhu-Bao Shao, Xiu-Li Wang\*, Li Chen, Yu-Zhong Wang\**

Center for Degradable and Flame-Retardant Polymeric Materials, College of Chemistry, State Key Laboratory of Polymer Materials Engineering, National Engineering Laboratory of Eco-Friendly Polymeric Materials (Sichuan), Sichuan University, Chengdu 610064, China

The residue at the same temperature of FPUF-20 was calculated by the formula as follows:  $W(\text{pure FPUF}) \times 0.88 + W(\text{FPUF-20}) \times 0.12$ . The calculated TG curve and the actual TG curve of FPUF-20 are shown in the following Figure.

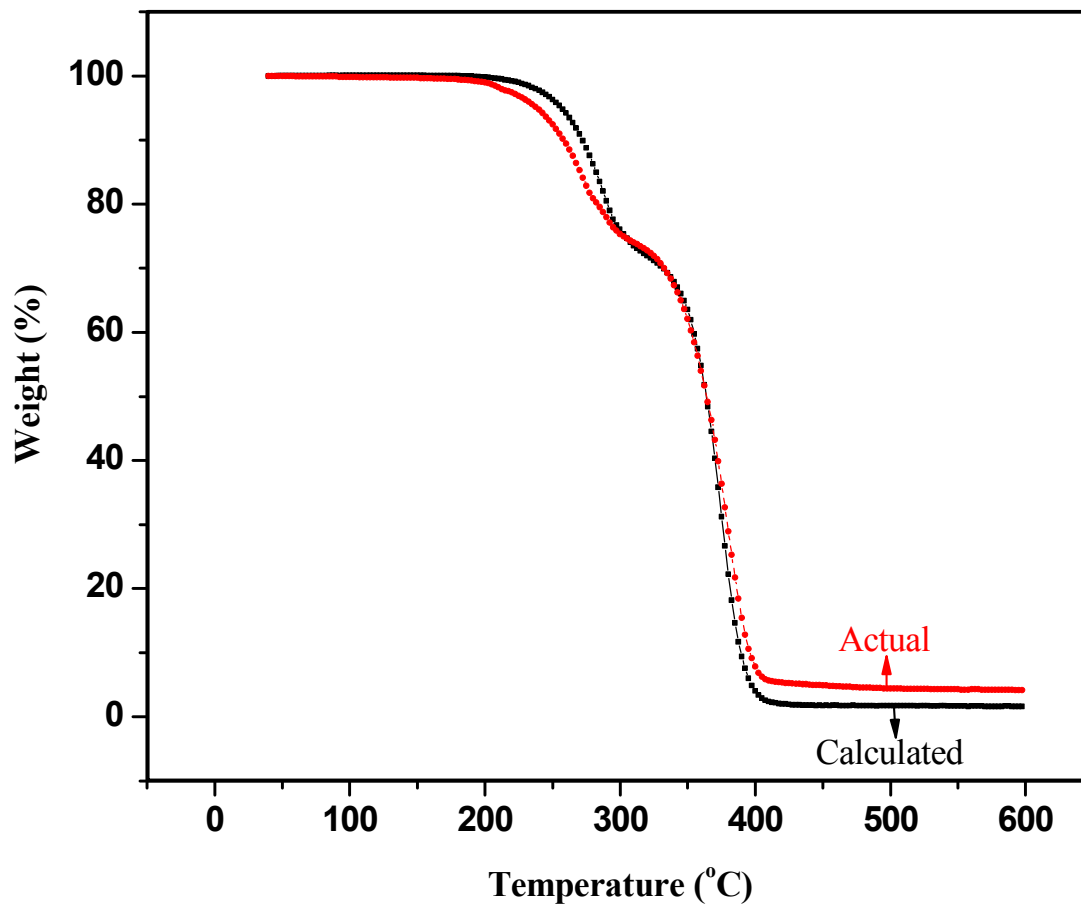

**Supplementary figure 1.** The calculated TG and the actual TG curves of FPUF-20.
